# Supplementary material for: Alternative Splicing Regulates Targeting of Malate Dehydrogenase in Yarrowia lipolytica
Source: PubMed Central journal article supplement — DNA Res. 2012 Feb 24;19(3):231–44. doi: 10.1093/dnares/dss007 (PMC3372373; doi:10.1093/dnares/dss007), 2012-02-24
Supplement: supp_dss007_dss007supp_fig1.pdf [file supp_dss007_dss007supp_fig1.pdf]

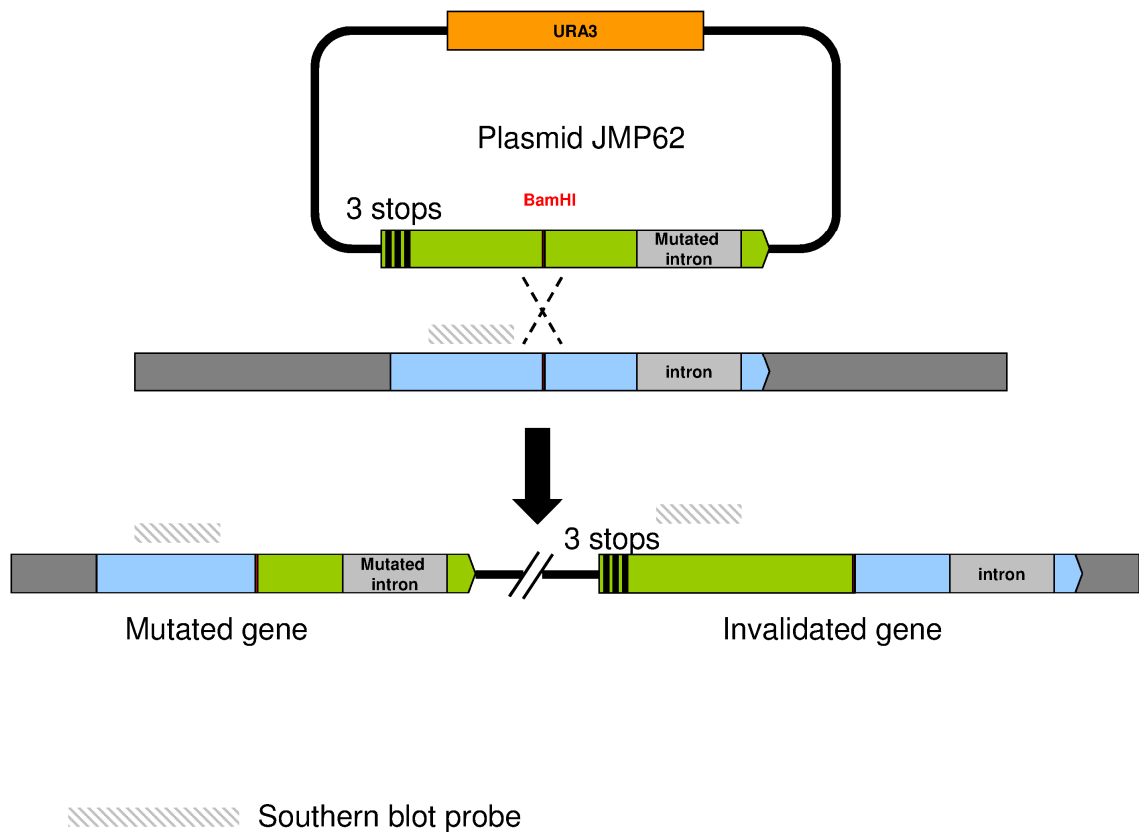

Supplementary Figure S1. Strategy for construction of strains containing deletions of either the short or long intron of *YIMDH2*.

Mutated forms of *YIMDH2* were produced by PCR amplification with primers listed in Table 2. The forward primer contained a *Cla*I restriction site and introduces stop codons in the three phases. The reverse primers contained an *Avr*II site and sequences corresponding to the wild-type gene and to the two variants. The corresponding *Cla*I-*Avr*II PCR fragments were cloned into the JMP62 *URA3ex* vector previously digested with *Cla*I-*Avr*II containing URA3 marker (orange rectangle). The resulting plasmids were purified, digested with *Bam*HI (a *Bam*HI site is present in the middle of the gene), and used to transform the PO1d strain. After single crossing-over, the mutated version of *YIMDH2* (green rectangles) had integrated at the *YIMDH2* locus (blue rectangles) under its own promoter and the genomic version was invalidated by the introduction of stop codons at the 5'-end of the wild-type gene. The resulting strains JMY1699, JMY1707 and JMY1711 (Table 1) expressed the predicted cytoplasmic, peroxisomal and wild-type versions of the *YIMDH2* gene products and were confirmed by southern blot using a probe represented by grey cross hatches.
